# Supplementary material for: First comprehensive stable isotope dataset of diverse water units in a permafrost-dominated catchment on the Qinghai–Tibet Plateau
Source: Copernicus journal article supplement (doi:10.5194/essd-16-3755-2024), 2024-08-23
Supplement: Supplementary file [file essd-16-3755-2024-supplement-title-page.pdf › essd-16-3755-2024-supplement-title-page.pdf]

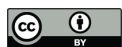

## *Supplement of*

# **First comprehensive stable isotope dataset of diverse water units in a permafrost-dominated catchment on the Qinghai–Tibet Plateau**

**Yuzhong Yang et al.**

*Correspondence to:* Yuzhong Yang (yangyuzhong08@lzb.ac.cn) and Xiaoyan Guo (guoxy2012@lzb.ac.cn)

- [essd-16-3755-2024-supplement-title-page.pdf](#)
- [Supplementary materials.docx](#)

The copyright of individual parts of the supplement might differ from the article licence.
